# Supplementary material for: Bandgap and strain engineering in epitaxial rocksalt structure (Ti0.5Mg0.5)1−xAlxN(001) semiconductors
Source: Royal Society of Chemistry journal article supplement (doi:10.1039/d0tc03598j), 2020-01-01
Supplement: d0tc03598j1.pdf [file d0tc03598j1.pdf]

## Supplemental Material

for

### Bandgap and Strain Engineering in Epitaxial Rocksalt Structure $(\text{Ti}_{0.5}\text{Mg}_{0.5})_{1-x}\text{Al}_x\text{N}(001)$ Semiconductors

Baiwei Wang <sup>a</sup>, Minghua Zhang <sup>a</sup>, Vijaya Adhikari <sup>b</sup>, Peijiao Fang <sup>a</sup>, Sanjay V. Khare <sup>b</sup>,  
Daniel Gall <sup>a</sup>

<sup>a</sup> Department of Materials Science and Engineering, Rensselaer Polytechnic Institute, Troy, NY 12180, USA

<sup>b</sup> Department of Physics and Astronomy, University of Toledo, 2801 West Bancroft Street, Toledo, OH 43606, USA

The supplementary Figure S1 provides optical reflection spectra for all samples in this study. These spectra determine the optical color of each sample, as described in the main document.

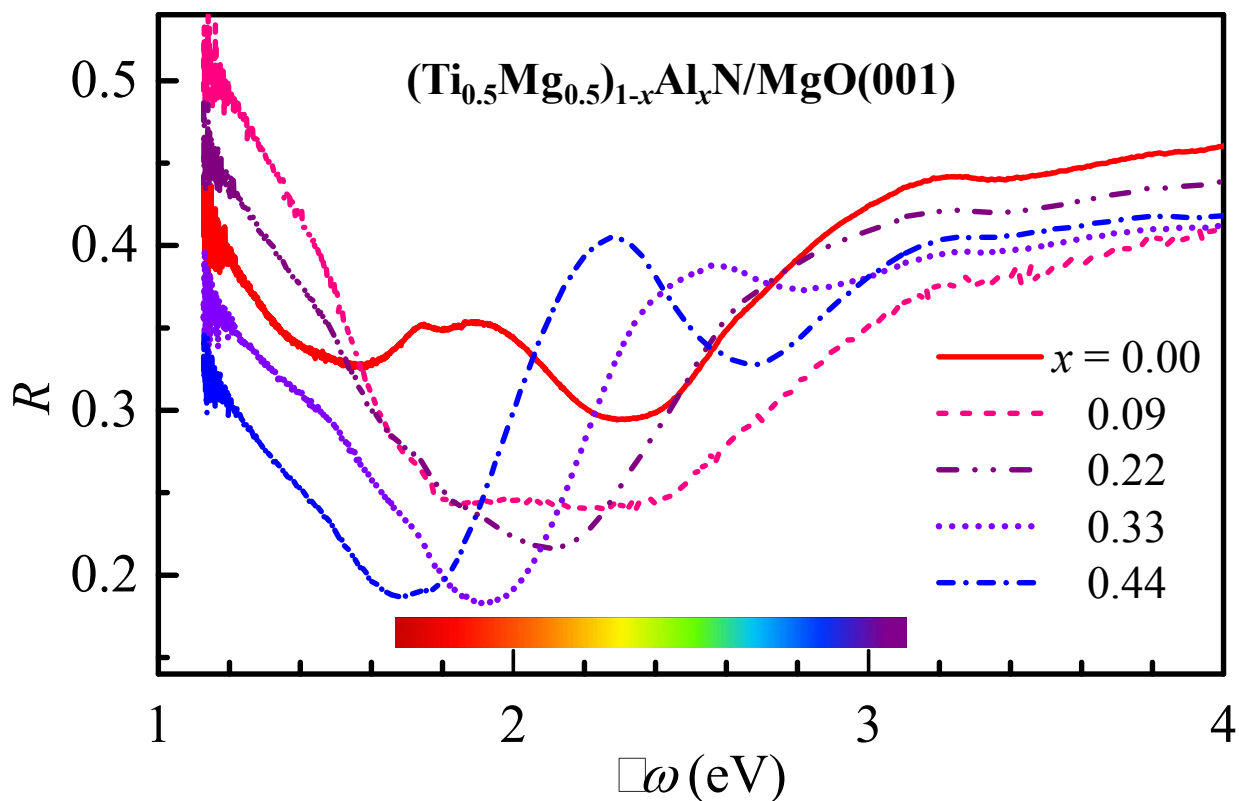

Figure S1: Optical reflection vs photon energy  $\hbar\omega = 1.1\text{-}4.0$  eV for 75-135 nm thick  $(\text{Ti}_{0.5}\text{Mg}_{0.5})_{1-x}\text{Al}_x\text{N}/\text{MgO}(001)$  layers. The color-decorated spectrum bar at the bottom indicates the color for specific photon energies.
